# Supplementary material for: N-doped carbon nanotubes encapsulating Co materials with strong magnetic properties generate ˙O2− through activation of hydrogen peroxide to effectively degrade rhodamine B
Source: Royal Society of Chemistry journal article supplement (doi:10.1039/d4nj04392h), 2024-11-20
Supplement: d4nj04392h1.pdf [file d4nj04392h1.pdf]

## Supporting information

**N doped carbon nanotubes encapsulated Co materials with strong magnetic property generate  $\cdot\text{O}_2^-$  through activate hydrogen peroxide to effectively degrade Rhodamine B**

Shuang Liu<sup>#</sup>, Hongyan Li<sup>#</sup>, Mingxin Yan<sup>#</sup>, Hui Kong, Lei Chen, Jiawei Zhang, Jingxiang Zhao, Qinghai Cai\*

Key Lab for Photonic and Electronic Bandgap Materials, Ministry of Education, School of Physics and electronic Engineering, School of Chemistry and Chemical Engineering, Center for Modern Education Technique and Experiment, Heilongjiang Province Collaborative Innovation Center of Cold Region Ecological Safety, Harbin Normal University, No. 1 Shida Road Limin development Zone, Harbin 150025, P. R. China.

\* Corresponding authors.

E-mail addresses: qinghaic@163.com (Qinghai Cai)

<sup>#</sup> Shuang Liu, Hongyan Li and Mingxin Yan contribute equally to this work.

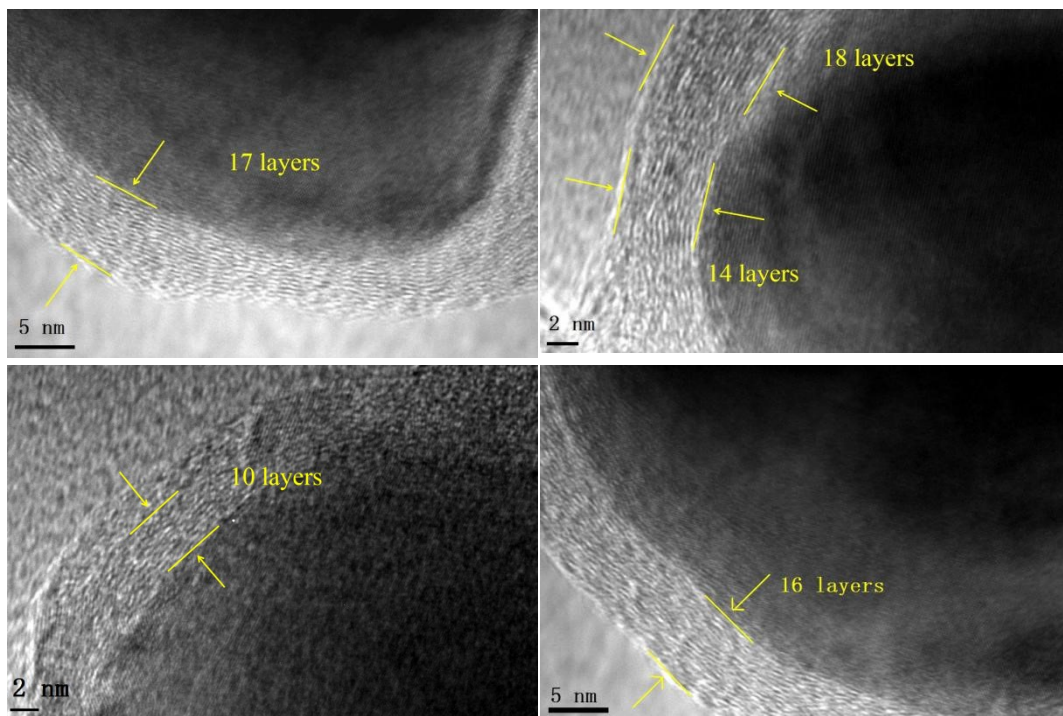

**Fig. S1** Carbon layers of Co@NC-500 in HRTEM images

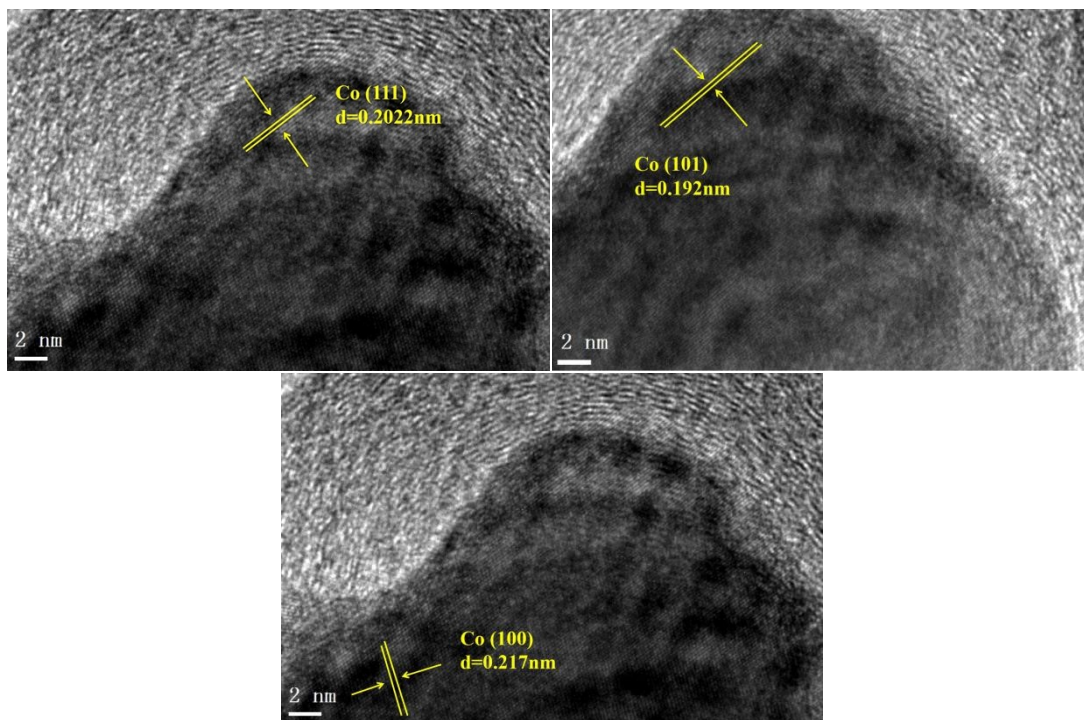

**Fig. S2** lattice stripes for Co@NC-500 in HRTEM images

## Peak Analysis

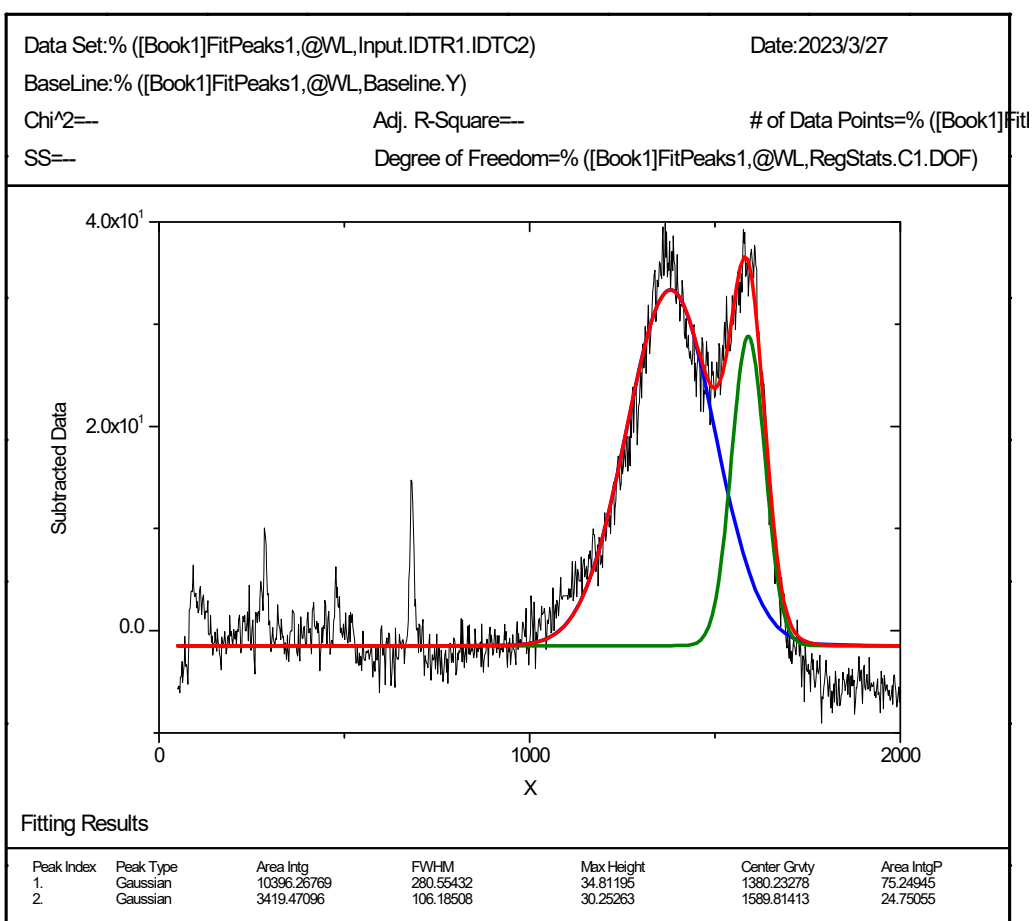

**Fig. S3** Raman spectrum of Co@NC material

$$[I_D/I_G \text{ (intensity)} = 30.25/34.81 = 0.87]$$

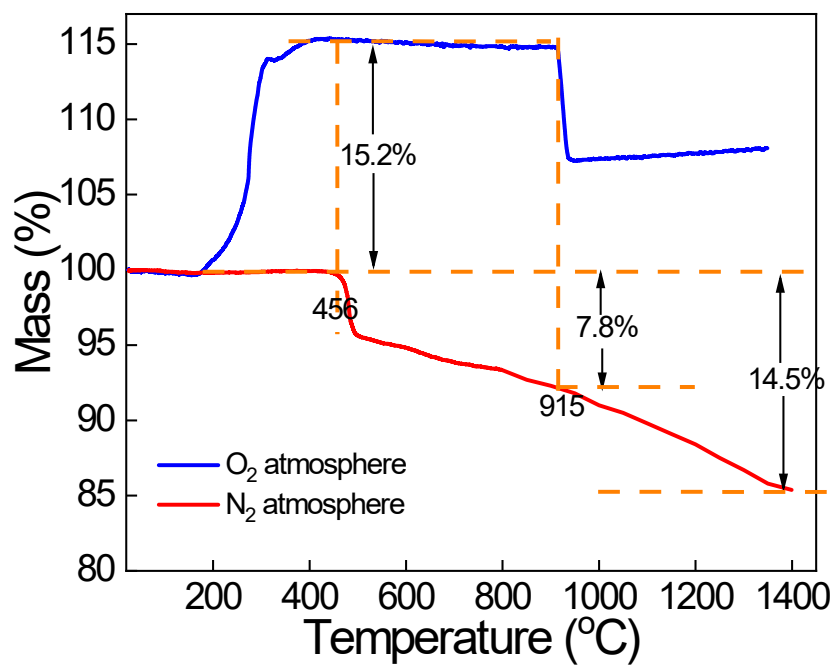

Fig. S4 TG of Co@NC-500 material.

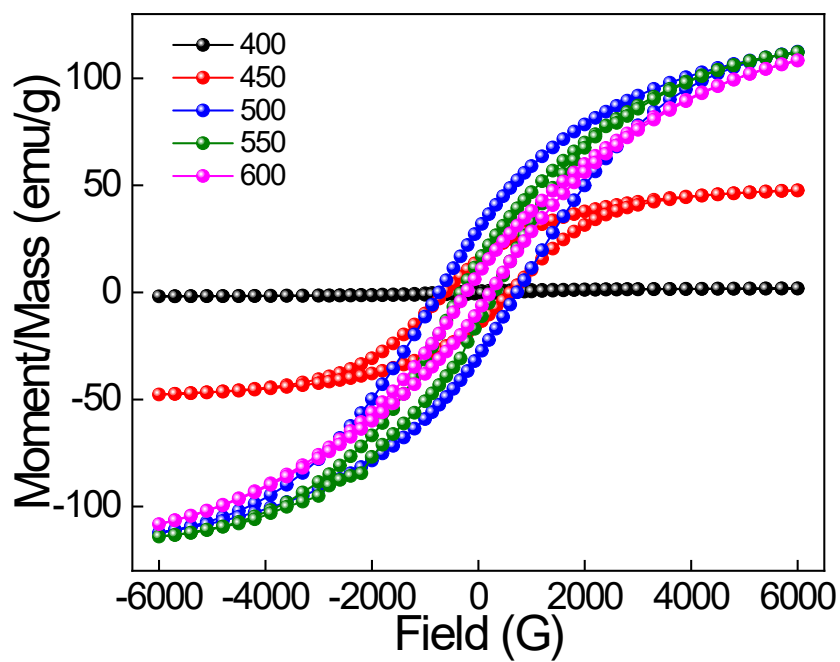

Fig. S5 Magnetic properties of Co@NC prepared at various calcination temperature.

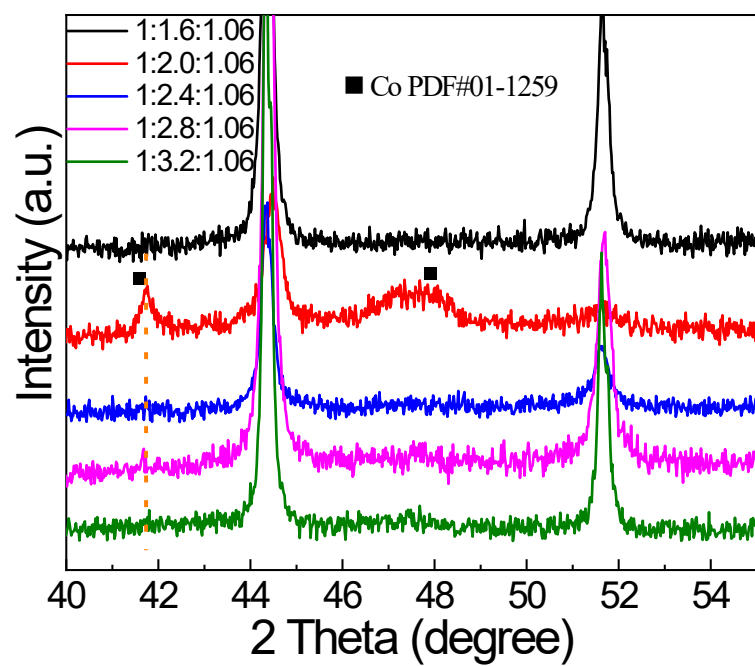

Fig. S6 XRD patterns of Co@NC with various contents of Ma

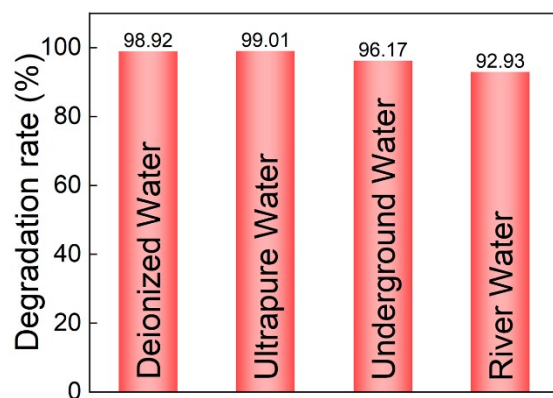

**Fig. S7** The degradation performance of Co@NC-500/H<sub>2</sub>O<sub>2</sub> system for RhB in four water samples.



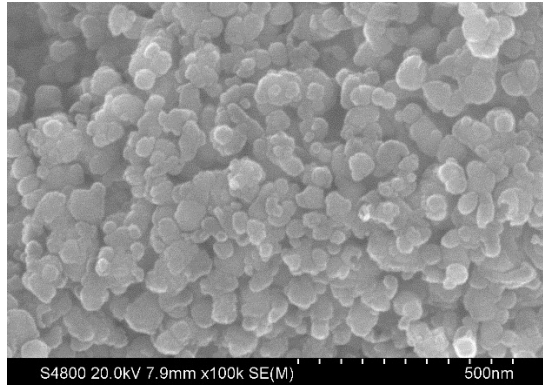

**Fig. S8** SEM image of Co@NC-500 sample after cycling.

**Table S1** Element composition detected by XPS

| Elements | BE     | At%   |
|----------|--------|-------|
| C1s      | 284.93 | 71.65 |
| N 1s     | 398.98 | 9.89  |
| O1s      | 531.90 | 11.28 |
| Co2p     | 778.84 | 7.13  |

**Table S2** Magnetic properties of Co@NC prepared at various calcination temperature

| Temperature (deg.) | Bs (emu/g) | Br (emu/g) | Hc(Oe) |
|--------------------|------------|------------|--------|
| 400                | 1.8        | 0.5        | 526.7  |
| 450                | 47.7       | 14.7       | 602.2  |
| 500                | 101.3      | 35.0       | 999.5  |
| 550                | 113.1      | 14.1       | 291.7  |
| 600                | 108.3      | 8.6        | 250.0  |
| 650                | 135.2      | 17.8       | 290.2  |

**Table S3** Magnetic properties of Co@NC

| Molar ratio of OA:Ma:Co | B <sub>s</sub> (emu/g) | B <sub>r</sub> (emu/g) | H <sub>c</sub> (Oe) |
|-------------------------|------------------------|------------------------|---------------------|
| 0.6:2:1.06              | 142.4                  | 2.9                    | 34.5                |
| 1.0:2:1.06              | 101.3                  | 35.0                   | 999.5               |
| 1.4:2:1.06              | 0.6                    | 0.07                   | 500.0               |
| 1.8:2:1.06              | 86.6                   | 33.3                   | 1068.6              |
| 1:1.6:1.06              | 123.8                  | 3.0                    | 89.0                |
| 1:2.4:1.06              | 77.6                   | 23.3                   | 946.3               |
| 1:2.8:1.06              | 117.0                  | 9.7                    | 250.0               |
| 1:3.2:1.06              | 65.7                   | 22.8                   | 966.7               |
| 1:2:0.85                | 6.5                    | 2.8                    | 1049.0              |
| 1:2:1.27                | 119.6                  | 3.6                    | 53.0                |
| 1:2:1.48                | 193.6                  | 7.1                    | 70.2                |
